# Supplementary material for: How to calibrate luminescent crossover thermometers: a note on “quasi”-Boltzmann systems
Source: Royal Society of Chemistry journal article supplement (doi:10.1039/d2tc01152b), 2022-01-01
Supplement: d2tc01152b1.pdf [file d2tc01152b1.pdf]

## Electronic Supplementary Material

### How to calibrate luminescent crossover thermometers: A note on “quasi”-Boltzmann thermometers

Benedikt Bendel,<sup>a</sup> and Markus Suta<sup>a\*</sup>

<sup>a</sup> Inorganic Photoactive Materials, Institute of Inorganic and Structural Chemistry, Heinrich Heine University Düsseldorf, Universitätsstraße 1, 40225 Düsseldorf, Germany.

\* Corresponding author: [markus.suta@hhu.de](mailto:markus.suta@hhu.de)

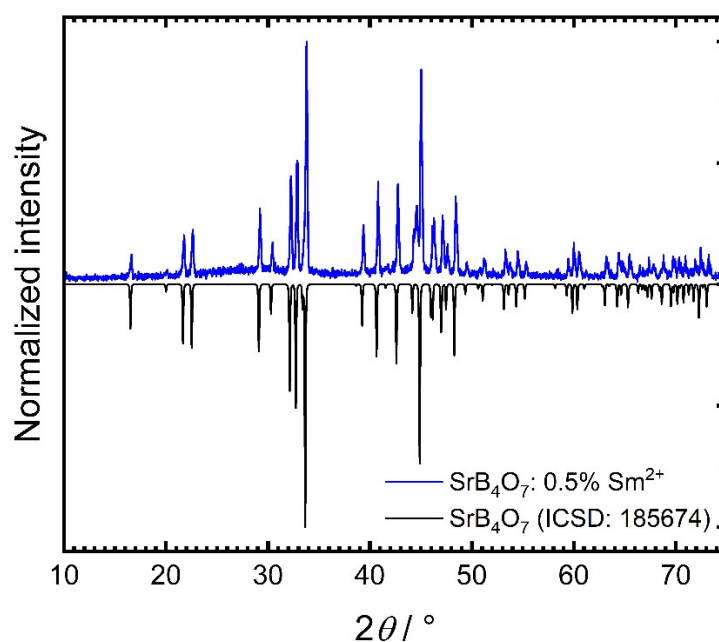

**Figure S1.** Powder X-ray diffraction pattern (Cu  $K_{\alpha 1}$  radiation,  $\lambda = 1.5406 \text{ \AA}$ ) of synthesized microcrystalline SrB<sub>4</sub>O<sub>7</sub>: 0.5% Sm<sup>2+</sup> in comparison to a database pattern simulated from single-crystal structural data on SrB<sub>4</sub>O<sub>7</sub> (ICSD depository no.: 185674)<sup>[1]</sup>.

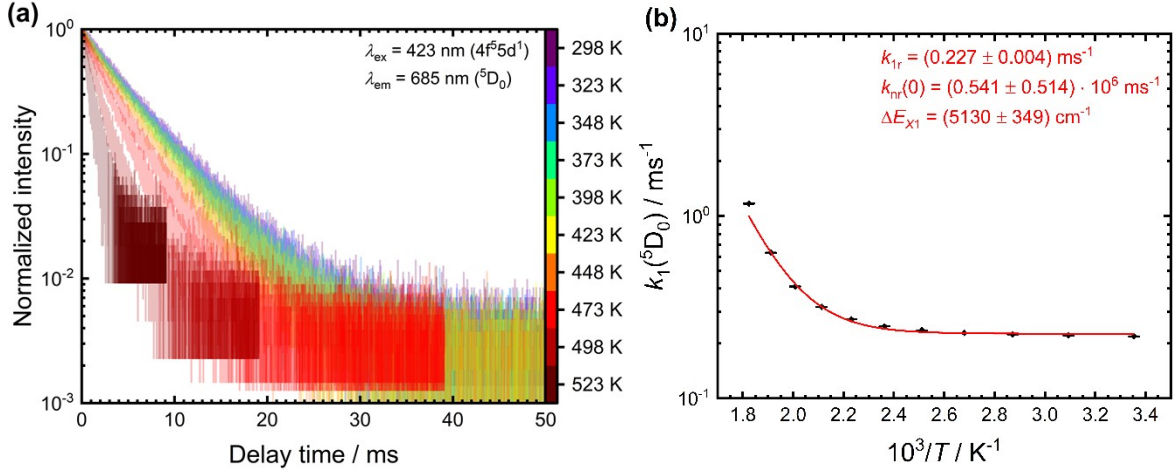

**Figure S2.** (a) Temperature-dependent luminescence decay curves ( $\lambda_{\text{ex}} = 423 \text{ nm}$ ) of the  ${}^5\text{D}_0 \rightarrow {}^7\text{F}_0$ -related emission at  $685 \text{ nm}$ . All curves showed a single exponential decay. (b) Temperature evolution of the extracted decay rates  $k_1$ . The red line indicates a fit to the sum of  $k_{1r}$  and the non-radiative contribution modelled by eq. (1) in the manuscript. Due to the lack of more high-temperature points,  $k_{nr}(0)$  and  $\Delta E_{X1}$  cannot be reliably determined from the fit.

### Derivation of eq. (4) from eq. (3) in the manuscript

We start with eq. (3) of the manuscript

$$R_{21}(T) = \frac{I_2}{I_1} = C \frac{n_2}{n_1} = C \frac{\alpha_{a2}k_{1r} + (\alpha_{a1} + \alpha_{a2})k_{nr}(0)\exp\left(-\frac{\Delta E_{X1}}{k_B T}\right)}{\alpha_{a1}k_{2r} + (\alpha_{a1} + \alpha_{a2})k_{nr}(0)} \quad (\text{S1})$$

The electronic pre-constant  $C$  can be defined as

$$C = \frac{k_{2r}}{k_{1r}}, \quad (\text{S2})$$

if the two radiative transitions denote the cumulated transitions from the excited states  $|2\rangle$  and  $|1\rangle$  to the different ground levels, respectively (such that no branching ratios need to be considered). In that case, eq. (S1) evolves to

$$R_{21}(T) = \frac{\alpha_{a2}k_{2r}}{\alpha_{a1}k_{2r} + (\alpha_{a1} + \alpha_{a2})k_{nr}(0)} + \frac{k_{2r}}{k_{1r}} \frac{(\alpha_{a1} + \alpha_{a2})k_{nr}(0)}{\alpha_{a1}k_{2r} + (\alpha_{a1} + \alpha_{a2})k_{nr}(0)} \exp\left(-\frac{\Delta E_{X1}}{k_B T}\right), \quad (\text{S3})$$

and with the abbreviation

$$k_{\text{eff}} = \alpha_{a1}k_{2r} + (\alpha_{a1} + \alpha_{a2})k_{nr}(0), \quad (\text{S4})$$

we finally arrive at eq. (4) of the manuscript

$$R_{21}(T) = \frac{\alpha_{a2}k_{2r}}{k_{\text{eff}}} + \frac{k_{2r}}{k_{1r}} \frac{(\alpha_{a1} + \alpha_{a2})k_{nr}(0)}{k_{\text{eff}}} \exp\left(-\frac{\Delta E_{X1}}{k_B T}\right) \equiv A + B \exp\left(-\frac{\Delta E_{X1}}{k_B T}\right). \quad (\text{S4})$$

### References

- [1] W. D. Stein, J. Liebertz, P. Becker, L. Bohaty, M. Braden, *Eur. J. Phys. B*, 2012, **85**, 236.
